1  
2  
3  
4  
5  
6  
7  
8  
9  
10  
11  
12  
13  
14  
15

## Machine learning for improved dengue diagnosis, Puerto Rico

Zachary J. Madewell, PhD<sup>1\*</sup>; Dania M. Rodriguez, MS<sup>1</sup>; Maile B. Thayer, PhD<sup>1</sup>; Vanessa Rivera-Amill, PhD<sup>2</sup>; Jomil Torres Aponte, MS<sup>1,3</sup>; Melissa Marzan-Rodriguez, DrPH<sup>3</sup>; Gabriela Paz-Bailey, MD, PhD<sup>1</sup>; Laura E. Adams, DVM<sup>1</sup>; Joshua M. Wong, MD<sup>1</sup>

<sup>1</sup> Division of Vector-Borne Diseases, Centers for Disease Control and Prevention, San Juan, Puerto Rico.

<sup>2</sup> Ponce Health Sciences University/Ponce Research Institute, Ponce, Puerto Rico.

<sup>3</sup> Division of Epidemiology & Research, Puerto Rico Department of Health, San Juan, Puerto Rico.

\*Correspondence to: Zachary J. Madewell, Division of Vector-Borne Diseases, Centers for Disease Control and Prevention, San Juan, Puerto Rico; email: [ock0@cdc.gov](mailto:ock0@cdc.gov)

## 16 **Abstract**

17 **Background:** □ Diagnosing dengue accurately, especially in resource-limited settings, remains  
18 challenging due to overlapping symptoms with other febrile illnesses and limitations of current diagnostic  
19 methods. This study aimed to develop machine learning (ML) models that leverage readily available  
20 clinical data to improve diagnostic accuracy for dengue, potentially offering a more accessible and rapid  
21 diagnostic tool for healthcare providers.

22 **Methods:** □ We used data from the Sentinel Enhanced Dengue Surveillance System (SEDSS) in Puerto  
23 Rico (May 2012—June 2024). SEDSS primarily targets acute febrile illness but also includes cases with  
24 other symptoms during outbreaks (e.g., Zika and COVID-19). ML models (logistic regression, random  
25 forest, support vector machine, artificial neural network, adaptive boosting, light gradient boosting  
26 machine [LightGBM], and extreme gradient boosting [XGBoost]) were evaluated across different feature  
27 sets, including demographic, clinical, laboratory, and epidemiological variables. Model performance was  
28 assessed using the area under the receiver operating characteristic curve (AUC), where higher AUC  
29 values indicate better performance in distinguishing dengue cases from non-dengue cases.

30 **Results:** □ Among 49,679 patients in SEDSS, 1,640 laboratory-confirmed dengue cases were  
31 identified. □ The □ XGBoost and LightGBM models achieved the highest diagnostic accuracy, with AUCs  
32 exceeding 90%, particularly with comprehensive feature sets. Incorporating predictors such as monthly  
33 dengue incidence, leukopenia, thrombocytopenia, rash, age, and absence of nasal discharge significantly  
34 enhanced model sensitivity and specificity for diagnosing dengue. Adding more relevant clinical and  
35 epidemiological features consistently improved the models' ability to correctly identify dengue cases.

36 **Conclusions:** □ ML models, especially XGBoost and LightGBM, show promise for improving diagnostic  
37 accuracy for dengue using widely accessible clinical data, even in resource-limited settings. Future  
38 research should focus on developing user-friendly tools, such as mobile apps, web-based platforms, or  
39 clinical decision systems integrated into electronic health records, to implement these models in clinical  
40 practice and exploring their application for predicting dengue.

41

42 **Keywords:** dengue; machine learning; diagnosis; Caribbean; extreme gradient boosting

## 43 **Author summary**

44 Dengue is a tropical disease caused by the dengue virus, which is transmitted by mosquitoes. It affects  
45 millions of people worldwide every year, leading to severe illness and even death in some cases. Accurate  
46 and timely diagnosis of dengue is crucial for proper treatment and controlling the spread of the virus.  
47 Traditionally, diagnosing dengue relies on symptoms and laboratory tests, which can sometimes be non-  
48 specific and not immediately available in distinguishing dengue from other similar illnesses. In our study,  
49 we explored the use of machine learning, a type of artificial intelligence, to improve dengue diagnosis  
50 using patient information from Puerto Rico. Our models, which use information like age, symptoms, and  
51 specific blood cell counts, can accurately predict whether someone has dengue. We found that some  
52 simple information, like whether a patient has a rash or low blood cell counts, can be very helpful in  
53 making a diagnosis. While more complex models performed slightly better, simpler models can also be  
54 effective, especially in places with limited resources. Our study shows that using computer models can  
55 improve dengue diagnosis and help healthcare providers make better decisions for their patients.

## 56 **Introduction**

57           Dengue, a mosquito-borne viral infection transmitted by *Aedes* mosquitoes, is a significant global  
58 public health threat. Endemic in over 100 countries and affecting 2.5 billion people at risk, the virus poses  
59 a substantial burden on healthcare systems worldwide [1-3]. Dengue is caused by four distinct dengue  
60 viruses, also known as serotypes (DENV-1, -2, -3, and -4) that can lead to a spectrum of clinical  
61 presentations. These range from asymptomatic infections to debilitating illness, and in severe cases,  
62 potentially life-threatening complications like dengue hemorrhagic fever and dengue shock syndrome [4-  
63 6]. Globally, dengue is estimated to cause 390 million infections [7] and 40,500 deaths annually [8].

64           The United States unincorporated territory of Puerto Rico has a long history with dengue, with  
65 the first reported outbreak in 1899 [9]. Puerto Rico accounts for over 95% of all locally acquired dengue  
66 cases reported within the United States [10, 11]. Transmission follows a seasonal pattern, with large  
67 outbreaks typically occurring every three to five years [12]. From 2010–2020, dengue was associated with  
68 nearly 30,000 confirmed and probable cases including 584 severe cases, 10,000 hospitalizations, and 68  
69 deaths island-wide [11]. A large epidemic in Puerto Rico occurred in 2012–2013, dominated by DENV-1,  
70 although sporadic cases of DENV-4 also occurred. During 2016–2023, cases remained relatively low  
71 compared to historical levels. However, in early 2024, a concerning surge in cases prompted a public  
72 health emergency declaration by Puerto Rico’s Department of Health. The outbreak has placed increased  
73 pressure on the healthcare system, which was already strained by the ongoing syndemic of dengue,  
74 influenza, and COVID-19 [13]. Particularly, high bed occupancy observed in June 2024 due to COVID-  
75 19 has underscored the urgent need for improved diagnostic methods and effective public health  
76 interventions to manage and control the spread of dengue and other co-circulating pathogens.

77           Diagnosing dengue accurately can be difficult, particularly in the early stages of the illness, due  
78 to overlapping symptoms with other febrile illnesses and the need for repeated evaluations to distinguish  
79 dengue from other conditions as the illness progresses. Current diagnostic methods have their limitations  
80 as well. Laboratory tests for dengue, such as RT-PCR or serologic assays, require specialized equipment

81 and expertise, are often unavailable in resource-limited settings, and can take several days to return  
82 results, making them less suitable for guiding immediate clinical management decisions. These tests also  
83 have limited windows of detection; for example, PCR is most sensitive in the first week of illness, while  
84 serologic tests are more useful later, potentially missing cases depending on when patients present for  
85 care. Rapid tests, while faster, have limitations in sensitivity, can be costly, and have not been authorized  
86 for use in the United States. As a result, many dengue cases are not confirmed in time to guide clinical  
87 decisions, which can impact patient care, public health efforts, and accurate reporting of disease burden.  
88 For example, during outbreaks, many cases are clinically diagnosed based on symptoms and  
89 epidemiological context, as laboratory resources are often prioritized for severe cases or sentinel  
90 surveillance rather than confirming every suspected case.

91 This project proposes a novel approach to address these challenges by developing machine  
92 learning (ML) models for diagnosing dengue fever. These models leverage readily available data from the  
93 Sentinel Enhanced Dengue Surveillance System (SEDSS) in Puerto Rico, including demographics,  
94 symptoms, laboratory, and other factors. The models could be integrated into existing electronic health  
95 records (EHR) systems to assist clinicians in making timely diagnoses [14]. In clinical practice, the ML  
96 model could automatically analyze patient data upon entry, generating a risk score for dengue based on  
97 the combination of symptoms, patient history, and other available data [15]. When the model identifies a  
98 high probability of dengue, it would alert the clinician through the EHR system, prompting further  
99 investigation or specific diagnostic testing. This approach has been successfully used in other diseases,  
100 such as COVID-19 [16], infective endocarditis [17], and incident atrial fibrillation [18], where ML  
101 models are embedded into EHRs to provide early warnings for timely interventions, improving patient  
102 outcomes.

103 In resource-limited settings where EHR systems may not be universally available, these models  
104 could be adapted for use on portable devices like smartphones or tablets, enabling healthcare workers to  
105 input patient data and receive a risk score even when access to advanced diagnostic tools is limited. This

106 flexibility ensures that the benefits of ML-driven diagnostic support can be extended beyond well-  
107 resourced environments.

108 By tapping into the growing adoption of EHRs worldwide, ML models can offer a solution that is  
109 not constrained by the physical limitations of laboratory resources. In many regions, even where basic  
110 laboratory facilities are lacking, EHR systems are being rapidly adopted, allowing healthcare providers to  
111 store and analyze patient data electronically. This technological advancement presents a unique  
112 opportunity for ML to enhance diagnostic accuracy and provide timely insights using data that is already  
113 being collected. To identify the optimal approach, we compare the performance of multiple ML  
114 algorithms and sampling techniques alongside traditional logistic regression analysis. By using ML, this  
115 project aims to improve diagnostic accuracy for dengue compared to traditional methods, provide a rapid  
116 and accessible tool for resource-limited settings, and potentially reduce misdiagnosis rates to improve  
117 patient outcomes. This project aligns with the growing body of research exploring the use of ML for  
118 infectious disease diagnosis, particularly in areas with limited diagnostic resources [19-22].

119

## 120 **Methods**

### 121 **Study population**

122 In this analysis, we used data from SEDSS, an ongoing facility-based study in Puerto Rico that  
123 tracks the frequency and causes of acute febrile illness [23, 24]. Since its inception in 2012, SEDSS has  
124 included five sites: 1) Saint Luke’s Episcopal Hospital (SLEH) in Ponce, a tertiary acute care facility  
125 (2012–present), 2) SLEH-Guayama, a secondary acute care hospital (2013–2015), 3) Hospital de La  
126 Universidad de Puerto Rico in Carolina, another secondary acute care teaching hospital (2013–2015), 4)  
127 Centro de Emergencia y Medicina Integrada (CEMI), an outpatient acute care clinic in Ponce (2016–  
128 present), and 5) Auxilio Mutuo Hospital, a tertiary care facility in the San Juan Metro Area (2018–  
129 present). The data used for this analysis was downloaded from SEDSS on July 25, 2024.

130

## 131 **Study enrollment and data collection**

132 Participants in SEDSS are enrolled through convenience sampling. Potential participants are  
133 identified by triage nurses as any patient with an acute febrile illness (AFI) defined by the presence of  
134 fever ( $\geq 38.0^{\circ}\text{C}$  for temperatures measured orally,  $\geq 37.5^{\circ}\text{C}$  for temperatures measured rectally, and  
135  $\geq 38.5^{\circ}\text{C}$  for temperatures measured axillary) at the time of triage or chief complaint of having a fever  
136 within the past 7 days. During the Zika epidemic in Puerto Rico (June 2016–June 2018), patients were  
137 eligible if they presented with either rash and conjunctivitis, rash and arthralgia, or fever [25]. Starting in  
138 April 2020, patients with cough or dyspnea within the last 14 days (with or without fever) were also  
139 eligible to better capture respiratory viruses [13]. No age groups were excluded, although infants were  
140 only eligible for enrollment if they presented to the hospital after their initial discharge after birth. After  
141 meeting the inclusion criteria and being informed about the study, participants provided written informed  
142 consent. In cases where patients were incapacitated at the time of triage due to acute illness, consent was  
143 sought after their stabilization.

144 Data collection in SEDSS involves patient interviews and medical record reviews at both  
145 enrollment and convalescence (~7–14 days later). The case investigation form (CIF) gathers  
146 demographics, comorbidities, and clinical features. The convalescent sample processing form (CSPF)  
147 echoes CIF data, adding the second specimen collection date and AFI severity indicators  
148 (hospitalizations, clinic visits). Initially paper-based (CIF/CSPF), data collection transitioned to electronic  
149 format in 2020 using REDCap on Android tablets [26, 27].

## 151 **Sample collection and laboratory procedures**

152 Blood, nasopharyngeal (NP), and oropharyngeal (OP) specimens were collected at enrollment  
153 from eligible participants. Additional blood samples (serum and whole blood) were also collected during  
154 the convalescent phase. Participation required providing at least one sample (blood or OP/NP swab). All  
155 patients had molecular testing for dengue virus for specimens collected within 7 days of symptom onset.



156 Serologic testing for anti-DENV antibodies was performed using Immunoglobulin M (IgM) antibody  
157 capture enzyme-linked immunosorbent assay (ELISA) for specimens collected >3 days after symptom  
158 onset (6). Dengue cases were defined as a positive result for DENV by RT-PCR or DENV IgM.

159

## 160 **Variable selection**

161 Our variable selection process was designed to identify features at the initial clinical presentation  
162 that could assist in accurately diagnosing laboratory-confirmed dengue cases. We began by considering  
163 54 variables based on physicians' medical knowledge and clinical experience. These variables included  
164 demographic characteristics, recent travel history, warning signs, other clinical signs, and laboratory  
165 findings. Additionally, dengue monthly incidence in Puerto Rico during 2012 to 2024 was obtained from  
166 the Puerto Rico Passive Arboviral Disease Surveillance System (PADSS). This data informed prior  
167 knowledge that could influence a physician's dengue diagnosis, consistent with previous research [21].

168 To refine feature selection, we used logistic regression to calculate crude unadjusted odds ratios  
169 for each of the 54 variables. The use of unadjusted odds ratios allowed us to quickly assess the strength of  
170 association between each variable and dengue diagnosis without the complexity of adjusting for  
171 confounders at this stage. This step helped to screen variables and group them into feature sets based on  
172 their association with dengue, as indicated by the magnitude of their odds ratios. The rationale for this  
173 approach is that, in clinical practice, certain variables with strong associations (e.g., high or low odds  
174 ratios) may be more immediately relevant for consideration in a diagnostic model. This is particularly  
175 useful in scenarios where we want to simplify the feature selection process while still capturing the most  
176 impactful predictors. By using different odds ratio cutoffs (e.g., >6 or <0.17, >3 or <0.33, >2 or <0.50),  
177 we created four groups of variables with varying levels of association strength. Additionally, we included  
178 a group of variables that were statistically significant at  $p < 0.05$ , to ensure that we did not overlook  
179 potentially important features with more moderate associations.

180           The decision to use these crude odds ratios to define feature sets was driven by the need for a  
181 straightforward and clinically intuitive method to narrow down the initial list of 54 variables before  
182 applying more complex ML models. Although ML algorithms can automatically select and weight  
183 features during model training, this initial step allowed us to focus on variables that were already known  
184 to be clinically relevant or strongly associated with dengue, simplifying the interpretation of the models  
185 for clinicians. The final feature sets were then evaluated using various ML models to determine their  
186 predictive performance. The rationale for evaluating different sized feature sets was to understand how  
187 model performance might change as we included more or fewer variables. This approach helped us  
188 balance the trade-off between model complexity and predictive accuracy, particularly when considering  
189 the potential application of these models in different clinical settings.

190           Although previous dengue infection is a known risk factor for developing severe disease and can  
191 influence clinical presentation, it was excluded from the primary analysis due to limitations in its  
192 applicability to routine clinical practice. Immunoglobulin G (IgG) testing is not universally available, and  
193 interpreting positive IgG results can be challenging for clinicians, potentially leading to misdiagnosis.  
194 However, to assess the potential impact of this variable on model performance, we conducted an  
195 additional analysis incorporating a history of prior dengue infection (confirmed by IgG) as an additional  
196 feature in the highest performing model within each feature set. To further explore the performance of the  
197 models in resource-constrained settings, where complete blood counts (CBCs) might not be readily  
198 available, we conducted an additional subanalysis excluding leukopenia and thrombocytopenia from the  
199 highest performing models within each feature set.

200

## 201 **Sampling**

202           To address class imbalance in our dataset, we used downsampling to ensure an equal  
203 representation of dengue-positive and dengue-negative cases [28]. Class imbalance, where dengue-  
204 positive cases are significantly outnumbered by dengue-negative cases, can bias ML models towards the

205 majority class, reducing their ability to accurately predict minority class outcomes. Downsampling  
206 mitigates this issue by randomly reducing the number of majority class instances to match the number of  
207 minority class instances, thus balancing the dataset and improving the model's ability to accurately  
208 classify dengue-positive cases. This process was performed using the `downSample` function from the  
209 `caret` package in R [29], setting the ratio of positive to negative cases to 1:1. The datasets were then  
210 randomly partitioned into training and testing sets using a 70:30 ratio. The training sets were used to train  
211 the ML models, whereas the testing set was reserved for model evaluation.

212

## 213 **Machine learning models**

214 We used an initial logistic regression model as a baseline to explore the relationship between  
215 potential predictors and dengue diagnosis outcomes. This model was trained using the same groups of  
216 variables based on different odds ratio cutoffs as mentioned earlier: variables with odds ratios  $>6$ ,  $>3$ ,  $>2$ ,  
217 and any variables significant at  $p < 0.05$ . Stepwise selection was used to iteratively add or remove variables  
218 to identify the optimal model with the lowest Akaike Information Criterion (AIC). This approach  
219 balances model complexity and goodness-of-fit by selecting variables that contribute significantly to the  
220 model. The final logistic regression model, derived from stepwise selection, was evaluated on both the  
221 training and testing sets.

222 Six ML methods were used to predict dengue infections and assess feature importance. These  
223 algorithms were selected to represent a breadth of ML predictive models and reflect those commonly used  
224 as diagnostic tools for various diseases. The algorithms used include Random Forest (RF), Support  
225 Vector Machine (SVM), Artificial Neural Network (ANN), Adaptive Boosting (AdaBoost), Light  
226 Gradient Boosting Machine (LightGBM), and eXtreme Gradient Boosting (XGBoost). RF is an ensemble  
227 learning method that constructs multiple decision trees during training and outputs the mode of their  
228 predictions for classification or the mean prediction for regression [30]. SVM is a supervised learning  
229 algorithm that finds the optimal hyperplane to separate data points of different classes in the feature space

230 [31]. ANN is a computational model inspired by the way biological neural networks work, consisting of  
231 interconnected nodes (neurons) that process input data to learn and make predictions [32]. AdaBoosting is  
232 an ensemble technique that combines the predictions of several weak classifiers to create a strong  
233 classifier by focusing more on the instances that previous classifiers misclassified [33]. LightGBM is a  
234 fast, distributed, high-performance gradient boosting framework that uses tree-based learning algorithms  
235 for efficient and accurate predictions [34]. XGBoost is an optimized gradient boosting framework that  
236 uses decision trees and a range of enhancements for improved performance and speed in predictive  
237 modeling [34]. In this study, we specifically used the “gbtree” booster, which implements decision tree-  
238 based gradient boosting for learning the model.

239 For parameter optimization, we used a grid search to evaluate different combinations of  
240 hyperparameter values, and the area under the receiver operating characteristic curve (AUC-ROC) was  
241 used as the optimization metric. We used 5-fold cross-validation during model training to ensure  
242 robustness and reduce overfitting. Specific details of the grid search strategy and parameters included in  
243 each model are provided in the Table S2. For gradient boosting models, the training process used 100  
244 boosting rounds with early stopping if the evaluation metric did not improve for 10 rounds. The R  
245 packages randomForest [35], e1071 [36], nnet [37], ada [38], lightgbm [39], and xgboost [40], were used  
246 for implementing RF, SVM, ANN, AdaBoost, LightGBM, and XGBoost models, respectively.

247

## 248 **Performance evaluation**

249 Model performance was evaluated on both the training and testing sets using AUC-ROC as the  
250 primary performance metric. AUC-ROC is an aggregate measure of performance across all possible  
251 classification thresholds, providing a comprehensive assessment of the model’s ability to distinguish  
252 between classes. We used the DeLong method to calculate the confidence intervals for the AUC-ROC to  
253 ensure accurate estimation of the model’s performance [41]. Additionally, confusion matrices were  
254 generated to assess the model’s classification performance in terms of sensitivity, specificity, and

255 accuracy. The optimal threshold for classification was determined using Youden's index from the ROC  
256 curve [42]. Cohen's kappa was also calculated to measure the agreement between predicted and observed  
257 classifications, accounting for chance agreement.

258 Feature importance was assessed for each ML model. By quantifying each feature's contribution  
259 to the model's accuracy, we can identify the most influential features to better understand and improv  
260 predictions for each method. For RF, AdaBoost, LightGBM, and XGBoost, we used the varImp, varplot,  
261 lgb.importance, and xgb.importance functions from the randomForest [35], ada [38], lightgbm [39], and  
262 xgboost [40] packages. For SVM, we determined feature importance by calculating the absolute value of  
263 the coefficients from the support vectors. For ANN, we used permutation importance [43], which works  
264 by calculating the original AUC-ROC as a baseline, then permuting each feature to break its relationship  
265 with the target variable and recalculating the AUC-ROC. The importance of a feature is determined by  
266 the decrease in AUC-ROC after permutation; a significant drop indicates high importance. Predicted  
267 probabilities were uniformly binned, with mean predicted probabilities and observed positive case  
268 proportions calculated for each bin. All analyses were done using R version 4.4.0 [44].

269

## 270 **Post-hoc subanalysis: Evaluating AUC with sequential feature** 271 **addition**

272 After identifying feature sets based on crude odds ratios in the primary analysis, we performed a  
273 post-hoc subanalysis to evaluate model performance by sequentially adding the most important features  
274 from the highest-performing ML model. This approach simulates a refined diagnostic process where key  
275 features are known in advance. By recalculating AUC with each feature added, we assessed the  
276 incremental benefit of each and identified the minimum set of variables for optimal performance. This  
277 analysis also tested the robustness of our primary feature selection by comparing it to ML-derived feature  
278 importance.

279

280

## 281 **Ethics statement**

282           The Institutional Review Boards at the Centers for Disease Control and Prevention (CDC),  
283 Auxilio Mutuo, and Ponce Medical School Foundation approved the SEDSS study protocols 6214, and  
284 120308-VR/2311173707, respectively. Written consent to participate was obtained from all adult  
285 participants and emancipated minors. For minors aged 14 to 20 years, written consent was obtained, and  
286 for those aged 7 to 13 years, parental written consent and participant assent were obtained.

287

## 288 **Results**

### 289 **Participant Characteristics**

290           From May 2012 to June 2024, 51,219 unique AFI visits were recorded from 41,180 participants  
291 enrolled in SEDSS, including 8,035 hospitalizations or transfers and 73 deaths. Of these visits, there were  
292 49,679 AFI visits from 40,124 participants tested for DENV. The median age among was 15 years  
293 (interquartile range (IQR): 4, 38) and 52.8% were female (Table 1). From these, 1,640 (3.3%) had dengue  
294 (1,167 positive by RT-PCR, 473 positive by DENV IgM), 1,026 (62.5%) of which occurred during the  
295 2012–2013 epidemic. SEDSS participants tested positive for other arboviruses including chikungunya  
296 (n=2,291) and Zika (n=1,899), and respiratory viruses including influenza A (n=4,296), influenza B  
297 (n=1,726), human adenovirus (n=1,835), respiratory syncytial virus (n=1,576), and SARS-CoV-2  
298 (n=2,322), among others (S3 Table). The majority of the 1,155 serotyped dengue cases were DENV-1  
299 (n=903, 78.2%), followed by DENV-3 (n=111, 9.6%), DENV-2 (n=91, 7.9%), and DENV-4 (n=50,  
300 4.3%). Of 1,640 dengue cases, 737 (44.9%) were hospitalized or transferred, and two (0.1%) died.  
301 Median duration from symptom onset to presentation at the emergency room was 3 days [IQR: 1, 4] for  
302 dengue cases. A previous dengue infection, as indicated by a positive IgG test on or before the fifth day of  
303 illness, was present in 79.1% (n=564/713) of dengue cases tested. Additionally, 38.5% (n=632) had at

304 least one comorbidity, including obesity (28.4%), chronic pulmonary disease (20.2%), and hypertension  
 305 (9.0%).  
 306

**Table 1.** Demographic and clinical characteristics of participants (dengue and non-dengue cases), SEDSS, May 2012–June 2024. Dengue cases had a positive result for dengue by RT-PCR or IgM.

|                        | Total<br>N = 49679<br>n (%) | Laboratory-<br>confirmed<br>dengue cases<br>N = 1640<br>n (%) | Non-dengue<br>cases<br>N = 48039<br>n (%) | p-value |
|------------------------|-----------------------------|---------------------------------------------------------------|-------------------------------------------|---------|
| <b>Month</b>           |                             |                                                               |                                           | <0.001  |
| January                | 3706 (7.5)                  | 133 (8.1)                                                     | 3573 (7.4)                                |         |
| February               | 3792 (7.6)                  | 102 (6.2)                                                     | 3690 (7.7)                                |         |
| March                  | 3905 (7.9)                  | 71 (4.3)                                                      | 3834 (8.0)                                |         |
| April                  | 3939 (7.9)                  | 78 (4.8)                                                      | 3861 (8.0)                                |         |
| May                    | 4291 (8.6)                  | 107 (6.5)                                                     | 4184 (8.7)                                |         |
| June                   | 4377 (8.8)                  | 157 (9.6)                                                     | 4220 (8.8)                                |         |
| July                   | 4317 (8.7)                  | 144 (8.8)                                                     | 4173 (8.7)                                |         |
| August                 | 4489 (9.0)                  | 171 (10.4)                                                    | 4318 (9.0)                                |         |
| September              | 4366 (8.8)                  | 163 (9.9)                                                     | 4203 (8.7)                                |         |
| October                | 4423 (8.9)                  | 162 (9.9)                                                     | 4261 (8.9)                                |         |
| November               | 4184 (8.4)                  | 199 (12.1)                                                    | 3985 (8.3)                                |         |
| December               | 3890 (7.8)                  | 153 (9.3)                                                     | 3737 (7.8)                                |         |
| <b>Days post onset</b> |                             |                                                               |                                           | <0.001  |
| 0                      | 8363 (17.8)                 | 119 (7.9)                                                     | 8244 (18.2)                               |         |
| 1-3                    | 30321 (64.6)                | 699 (46.5)                                                    | 29622 (65.2)                              |         |
| 4-6                    | 6587 (14.0)                 | 621 (41.3)                                                    | 5966 (13.1)                               |         |
| 7+                     | 1633 (3.5)                  | 65 (4.3)                                                      | 1568 (3.5)                                |         |
| <b>Age group</b>       |                             |                                                               |                                           | <0.001  |
| <1                     | 3449 (6.9)                  | 31 (1.9)                                                      | 3418 (7.1)                                |         |
| 1-4                    | 10539 (21.2)                | 107 (6.5)                                                     | 10432 (21.7)                              |         |
| 5-9                    | 6640 (13.4)                 | 234 (14.3)                                                    | 6406 (13.3)                               |         |
| 10-19                  | 7394 (14.9)                 | 665 (40.5)                                                    | 6729 (14.0)                               |         |
| 20-29                  | 5885 (11.8)                 | 211 (12.9)                                                    | 5674 (11.8)                               |         |
| 30-39                  | 4046 (8.1)                  | 109 (6.6)                                                     | 3937 (8.2)                                |         |
| 40-49                  | 3294 (6.6)                  | 88 (5.4)                                                      | 3206 (6.7)                                |         |
| 50+                    | 8432 (17.0)                 | 195 (11.9)                                                    | 8237 (17.1)                               |         |
| <b>Female sex</b>      | 26238 (52.8)                | 761 (46.4)                                                    | 25477 (53.0)                              | <0.001  |
| <b>Health region</b>   |                             |                                                               |                                           | <0.001  |
| Aguadilla              | 44 (0.1)                    | 2 (0.1)                                                       | 42 (0.1)                                  |         |
| Arecibo                | 197 (0.4)                   | 4 (0.2)                                                       | 193 (0.4)                                 |         |
| Bayamon                | 1041 (2.1)                  | 26 (1.6)                                                      | 1015 (2.1)                                |         |
| Caguas                 | 588 (1.2)                   | 28 (1.7)                                                      | 560 (1.2)                                 |         |
| Fajardo                | 359 (0.7)                   | 16 (1.0)                                                      | 343 (0.7)                                 |         |
| Mayaguez               | 118 (0.2)                   | 6 (0.4)                                                       | 112 (0.2)                                 |         |
| Metro                  | 6523 (13.1)                 | 352 (21.5)                                                    | 6171 (12.8)                               |         |
| Ponce                  | 40667 (81.9)                | 1205 (73.5)                                                   | 39462 (82.1)                              |         |
| Unknown                | 142 (0.3)                   | 1 (0.1)                                                       | 141 (0.3)                                 |         |

|                                                       |              |             |              |        |
|-------------------------------------------------------|--------------|-------------|--------------|--------|
| <b>Previous DENV infection<sup>a</sup></b> (N = 2062) |              |             |              | 0.003  |
| Yes                                                   | 1703 (82.6)  | 564 (79.1)  | 1139 (84.4)  |        |
| No                                                    | 359 (17.4)   | 149 (20.9)  | 210 (15.6)   |        |
| <b>Traveled to another country in past two weeks</b>  | 1501 (3.0)   | 74 (4.5)    | 1427 (3.0)   | 0.001  |
| <b>Household member with dengue</b>                   | 619 (1.2)    | 133 (8.1)   | 486 (1.0)    | <0.001 |
| <b>Reported mosquito bites in past month</b>          | 8557 (17.2)  | 624 (38.0)  | 7933 (16.5)  | <0.001 |
| <b>Comorbidities</b>                                  |              |             |              |        |
| Chronic pulmonary disease or asthma                   | 9721 (19.6)  | 331 (20.2)  | 9390 (19.5)  | 0.544  |
| Cancer                                                | 907 (1.8)    | 26 (1.6)    | 881 (1.8)    | 0.519  |
| Chronic kidney disease                                | 607 (1.2)    | 12 (0.7)    | 595 (1.2)    | 0.085  |
| Congenital heart disease                              | 1822 (3.7)   | 52 (3.2)    | 1770 (3.7)   | 0.307  |
| Diabetes                                              | 4065 (8.2)   | 105 (6.4)   | 3960 (8.2)   | 0.009  |
| High cholesterol                                      | 3034 (6.1)   | 80 (4.9)    | 2954 (6.1)   | 0.039  |
| Hypertension                                          | 6664 (13.4)  | 147 (9.0)   | 6517 (13.6)  | <0.001 |
| Arthritis                                             | 1954 (3.9)   | 22 (1.3)    | 1932 (4.0)   | <0.001 |
| Thyroid disease                                       | 2980 (6.0)   | 69 (4.2)    | 2911 (6.1)   | 0.002  |
| Obesity                                               | 9221 (18.6)  | 199 (12.1)  | 9022 (18.8)  | <0.001 |
| Gastritis                                             | 531 (1.1)    | 27 (1.6)    | 504 (1.0)    | 0.028  |
| <b>Warning signs<sup>b</sup></b>                      |              |             |              |        |
| Persistent vomiting                                   | 9401 (18.9)  | 409 (24.9)  | 8992 (18.7)  | <0.001 |
| Abdominal pain                                        | 17476 (35.2) | 972 (59.3)  | 16504 (34.4) | <0.001 |
| Restlessness                                          | 18500 (37.2) | 767 (46.8)  | 17733 (36.9) | <0.001 |
| Clinical fluid accumulation                           | 2939 (5.9)   | 87 (5.3)    | 2852 (5.9)   | 0.093  |
| Mucosal bleeding                                      | 4276 (8.6)   | 255 (15.5)  | 4021 (8.4)   | <0.001 |
| Hepatomegaly                                          | 119 (0.2)    | 44 (2.7)    | 75 (0.2)     | <0.001 |
| <b>Other clinical signs/symptoms</b>                  |              |             |              |        |
| Fever                                                 | 45090 (90.8) | 1631 (99.5) | 43459 (90.5) | <0.001 |
| Conjunctivitis                                        | 1762 (3.5)   | 133 (8.1)   | 1629 (3.4)   | <0.001 |
| Chills                                                | 26690 (53.7) | 1309 (79.8) | 25381 (52.8) | <0.001 |
| Nausea                                                | 23125 (46.5) | 1127 (68.7) | 21998 (45.8) | <0.001 |
| No appetite                                           | 29972 (60.3) | 1282 (78.2) | 28690 (59.7) | <0.001 |
| Rash                                                  | 9268 (18.7)  | 924 (56.3)  | 8344 (17.4)  | <0.001 |
| Yellow skin                                           | 793 (1.6)    | 68 (4.1)    | 725 (1.5)    | <0.001 |
| Itchy skin                                            | 6574 (13.2)  | 603 (36.8)  | 5971 (12.4)  | <0.001 |
| Headache                                              | 29778 (59.9) | 1383 (84.3) | 28395 (59.1) | <0.001 |
| Eye pain                                              | 14106 (28.4) | 985 (60.1)  | 13121 (27.3) | <0.001 |
| Myalgia                                               | 23983 (48.3) | 1221 (74.5) | 22762 (47.4) | <0.001 |
| Arthralgia                                            | 19948 (40.2) | 1020 (62.2) | 18928 (39.4) | <0.001 |
| Tachypnea                                             | 9965 (20.1)  | 744 (45.4)  | 9221 (19.2)  | <0.001 |
| Back pain                                             | 17666 (35.6) | 874 (53.3)  | 16792 (35.0) | <0.001 |
| Calf pain                                             | 12638 (25.4) | 605 (36.9)  | 12033 (25.0) | <0.001 |
| Arthritis                                             | 4155 (8.4)   | 242 (14.8)  | 3913 (8.1)   | <0.001 |
| Nasal discharge                                       | 30350 (61.1) | 531 (32.4)  | 29819 (62.1) | <0.001 |
| Sore throat                                           | 22632 (45.6) | 599 (36.5)  | 22033 (45.9) | <0.001 |
| Cough                                                 | 33842 (68.1) | 702 (42.8)  | 33140 (69.0) | <0.001 |
| Diarrhea                                              | 13803 (27.8) | 709 (43.2)  | 13094 (27.3) | <0.001 |
| Hypotension                                           | 1327 (2.7)   | 133 (8.1)   | 1194 (2.5)   | <0.001 |
| Narrow pulse pressure                                 | 828 (1.7)    | 39 (2.4)    | 789 (1.6)    | 0.284  |
| Seizure                                               | 654 (1.3)    | 28 (1.7)    | 626 (1.3)    | 0.156  |
| Capillary refill <3                                   | 2955 (5.9)   | 99 (6.0)    | 2856 (5.9)   | 0.889  |
| Pale skin                                             | 11276 (22.7) | 772 (47.1)  | 10504 (21.9) | <0.001 |



|                                                 |                   |                   |                   |        |
|-------------------------------------------------|-------------------|-------------------|-------------------|--------|
| Blue lips                                       | 734 (1.5)         | 70 (4.3)          | 664 (1.4)         | <0.001 |
| <b>Laboratory</b>                               |                   |                   |                   |        |
| Leukopenia                                      | 3757 (7.6)        | 968 (59.0)        | 2789 (5.8)        | <0.001 |
| Thrombocytopenia                                | 4811 (9.7)        | 738 (45.0)        | 4073 (8.5)        | <0.001 |
| <b>Monthly dengue incidence per 1000 people</b> | 0.01 [0.00, 0.02] | 0.12 [0.04, 0.32] | 0.01 [0.00, 0.02] | <0.001 |

<sup>a</sup> Previous DENV infection was defined as a positive DENV IgG test result collected within 5 days of symptom onset.

<sup>b</sup> Hemoconcentration (an increase in hematocrit due to plasma loss) is a known warning sign for severe dengue but was excluded from this study, as it requires serial measurements that are challenging to obtain at initial patient contact. To maintain applicability for early, point-of-care diagnosis, we focused on predictors available at first presentation.

307

308           Among the 1,640 dengue cases, the most frequent symptoms were fever (99.5%, an inclusion  
309 criterion for SEDSS), headache (84.3%), and chills (79.8%) (Table 1). Common warning signs included  
310 abdominal pain (59.3%), restlessness (46.8%), and persistent vomiting (24.9%). Additionally, 59.0% of  
311 cases presented with leukopenia and 45.0% had thrombocytopenia.

312

## 313 Variable Selection

314           We identified key demographic, clinical, and laboratory characteristics significantly associated  
315 with dengue infection (Table S1) and created feature sets with 8 (OR>6 or <0.17), 20 (OR>3 or <0.33),  
316 32 (OR>2 or <0.50), and 48 (p<0.05) variables, allowing us to assess the impact of different feature  
317 combinations on model accuracy (Table S1). The 8-variable feature set included age group, days post  
318 onset, rash, fever, leukopenia, thrombocytopenia, hepatomegaly, and self-reported history of dengue in a  
319 household member from participant questionnaire. The 20-variable set was derived from the 8-variable  
320 set, adding reported recent mosquito bites, chills, itchy skin, headache, chronic arthritis, eye pain,  
321 myalgia, tachypnea, nasal discharge, hypotension, pale skin, and blue lips. The 32-variable set also  
322 included diagnosis month, abdominal pain, conjunctivitis, nausea, arthralgia, diarrhea, cough, yellow  
323 skin, no appetite, back pain, mucosal bleeding, and dengue monthly incidence in Puerto Rico. The 48-  
324 variable set also included sex, health region, recent travel, arthritis, sore throat, calf pain, gastritis, narrow  
325 pulse pressure, persistent vomiting, restlessness, hypertension, thyroid disease, chronic kidney disease,  
326 diabetes, high cholesterol, and obesity. Chronic pulmonary disease, cancer, congenital heart disease,

327 clinical fluid accumulation, seizure, and capillary refill <3 seconds were not associated with dengue  
328 infection at  $p < 0.05$  and were not included in ML models.

329

## 330 Performance evaluation

331 In addition to the multivariable LR, we used a diverse range of ML algorithms to predict the  
332 probability of dengue infection. These ML models offer the advantage of adapting to complex data  
333 patterns and potentially improving diagnostic accuracy.

334 The 8-variable feature set had the lowest estimated AUC values across all models, ranging from  
335 85.2% to 87.1% on the test set (Fig 1, Fig 2, Table 2). As the feature set size increased, AUCs  
336 progressively improved. The 20-variable set achieved 89.0% ~ 89.5% AUC, and the 32-variable set  
337 reached 91.3% ~ 94.2% AUC. The 48-variable set showed minimal further improvement (91.3% ~  
338 94.7%) compared to the 32-variable set.

339

340 **Fig 1. ROC curves of Logistic Regression, Support Vector Machine, Random Forest, Adaptive**  
341 **Boosting, Light Gradient Boosting, and Extreme Gradient Boosting models for (A) 8-, (B) 20-, (C)**  
342 **32-, and (D) 48-variable feature sets, SEDSS, May 2012–June 2024.** The area under the receiver  
343 operating characteristic curve is shown.

344

345 **Fig 2. Forest plot of AUC values for Logistic Regression, Support Vector Machine, Random Forest,**  
346 **Adaptive Boosting, Light Gradient Boosting, and Extreme Gradient Boosting models for (A) 8-, (B)**  
347 **20-, (C) 32-, and (D) 48-variable feature sets, SEDSS, May 2012–June 2024.** DeLong method was  
348 used to obtain the 95% confidence intervals for the AUC-ROC.

349

**Table 2.** Performance of each algorithm for predicting dengue infection on the **test set**, SEDSS, May 2012–June 2024.

| Model                         | Accuracy | Sensitivity | Specificity | PPV    | NPV    | F1 Score | Kappa  | AUC    |
|-------------------------------|----------|-------------|-------------|--------|--------|----------|--------|--------|
| <b>8-variable feature set</b> |          |             |             |        |        |          |        |        |
| Logistic Regression           | 0.8049   | 0.8821      | 0.7276      | 0.7641 | 0.8606 | 0.8189   | 0.6098 | 0.8672 |

|                                |        |        |        |        |        |        |        |        |
|--------------------------------|--------|--------|--------|--------|--------|--------|--------|--------|
| Support Vector Machine         | 0.7734 | 0.8679 | 0.6789 | 0.7299 | 0.8371 | 0.7929 | 0.5467 | 0.8521 |
| Random Forest                  | 0.7998 | 0.9004 | 0.6992 | 0.7496 | 0.8753 | 0.8181 | 0.5996 | 0.8588 |
| Artificial Neural Network      | 0.8089 | 0.8720 | 0.7459 | 0.7744 | 0.8535 | 0.8203 | 0.6179 | 0.8690 |
| Adaptive Boosting              | 0.8089 | 0.8821 | 0.7358 | 0.7695 | 0.8619 | 0.8224 | 0.6179 | 0.8700 |
| Light Gradient Boosting        | 0.8069 | 0.8963 | 0.7175 | 0.7603 | 0.8738 | 0.8228 | 0.6138 | 0.8701 |
| eXtreme Gradient Boosting      | 0.8100 | 0.8516 | 0.7683 | 0.7861 | 0.8381 | 0.8176 | 0.6199 | 0.8706 |
| <b>20-variable feature set</b> |        |        |        |        |        |        |        |        |
| Logistic Regression            | 0.8211 | 0.8476 | 0.7947 | 0.8050 | 0.8391 | 0.8257 | 0.6423 | 0.8905 |
| Support Vector Machine         | 0.8079 | 0.8760 | 0.7398 | 0.7710 | 0.8565 | 0.8202 | 0.6159 | 0.8901 |
| Random Forest                  | 0.8120 | 0.8760 | 0.7480 | 0.7766 | 0.8578 | 0.8233 | 0.6240 | 0.8896 |
| Artificial Neural Network      | 0.8191 | 0.8557 | 0.7825 | 0.7973 | 0.8443 | 0.8255 | 0.6382 | 0.8911 |
| Adaptive Boosting              | 0.8211 | 0.8577 | 0.7846 | 0.7992 | 0.8465 | 0.8275 | 0.6423 | 0.8919 |
| Light Gradient Boosting        | 0.8262 | 0.8374 | 0.8150 | 0.8191 | 0.8337 | 0.8281 | 0.6524 | 0.8943 |
| eXtreme Gradient Boosting      | 0.8201 | 0.8780 | 0.7622 | 0.7869 | 0.8621 | 0.8300 | 0.6402 | 0.8945 |
| <b>32-variable feature set</b> |        |        |        |        |        |        |        |        |
| Logistic Regression            | 0.8394 | 0.8272 | 0.8516 | 0.8479 | 0.8313 | 0.8374 | 0.6789 | 0.9126 |
| Support Vector Machine         | 0.8343 | 0.8862 | 0.7825 | 0.8029 | 0.8730 | 0.8425 | 0.6687 | 0.9130 |
| Random Forest                  | 0.8628 | 0.8740 | 0.8516 | 0.8549 | 0.8711 | 0.8643 | 0.7256 | 0.9318 |
| Artificial Neural Network      | 0.8415 | 0.8659 | 0.8171 | 0.8256 | 0.8590 | 0.8452 | 0.6829 | 0.9117 |
| Adaptive Boosting              | 0.8648 | 0.8801 | 0.8496 | 0.8540 | 0.8763 | 0.8669 | 0.7297 | 0.9380 |
| Light Gradient Boosting        | 0.8740 | 0.8882 | 0.8598 | 0.8636 | 0.8849 | 0.8758 | 0.7480 | 0.9414 |
| eXtreme Gradient Boosting      | 0.8730 | 0.8760 | 0.8699 | 0.8707 | 0.8753 | 0.8734 | 0.7459 | 0.9424 |
| <b>48-variable feature set</b> |        |        |        |        |        |        |        |        |
| Logistic Regression            | 0.8547 | 0.8699 | 0.8394 | 0.8442 | 0.8658 | 0.8569 | 0.7093 | 0.9134 |
| Support Vector Machine         | 0.8547 | 0.8598 | 0.8496 | 0.8511 | 0.8583 | 0.8554 | 0.7093 | 0.9168 |
| Random Forest                  | 0.8659 | 0.8740 | 0.8577 | 0.8600 | 0.8719 | 0.8669 | 0.7317 | 0.9385 |
| Artificial Neural Network      | 0.8547 | 0.8923 | 0.8171 | 0.8299 | 0.8835 | 0.8599 | 0.7093 | 0.9185 |
| Adaptive Boosting              | 0.8730 | 0.8598 | 0.8862 | 0.8831 | 0.8634 | 0.8713 | 0.7459 | 0.9401 |
| Light Gradient Boosting        | 0.8770 | 0.9207 | 0.8333 | 0.8467 | 0.9131 | 0.8822 | 0.7541 | 0.9456 |
| eXtreme Gradient Boosting      | 0.8791 | 0.8618 | 0.8963 | 0.8926 | 0.8664 | 0.8769 | 0.7581 | 0.9465 |

PPV: positive predictive value; NPV: negative predictive value; AUC: area under receiver operating characteristic curve.

350

351           Among ML models, LightGBM and XGBoost consistently achieved the highest AUC across all  
352 feature sets, outperforming multivariable LR, SVM, and ANN by ~3% for the 32- and 48-variable sets.  
353 This higher performance is likely due to their ability to efficiently handle large feature spaces, capture  
354 complex interactions, and prevent overfitting through advanced regularization techniques. Despite this,  
355 even simpler models like LR achieved strong performance with AUCs of 91% for the larger feature sets  
356 (32 and 48 variables), suggesting that core features captured a substantial amount of the predictive signal.  
357 AUC values exceeded 93% for all models in the 32- and 48-variable sets when evaluated on the training  
358 set (S4 Table).

359 All models had high sensitivity (>84%) across feature sets (Table 2). Specificity was lower for  
360 the 8-variable set (67.9 ~ 76.8%) but improved to >85% for most models in the 32- and 48-variable sets.  
361 XGBoost with 48-variables achieved the highest overall AUC (94.7%), with corresponding sensitivity  
362 and specificity of 86.2% and 89.6%, respectively. Adding IgG testing improved the performance of  
363 XGBoost models across all feature sets, increasing AUC values by 2.6%, 2.0%, 0.5%, and 0.2% for the 8-  
364 , 20-, 32-, and 48-variable sets, respectively (S5 Table). Excluding leukopenia and thrombocytopenia  
365 from the XGBoost models resulted in a decrease in AUC values, ranging from 0.5% for the 48-variable  
366 set to 5.5% for the 8-variable set.

367 F1 scores consistently exceeded 82% across all models for the 20-, 32-, and 48-variable sets,  
368 indicating a good balance of precision (correct positive predictions out of all positive predictions) and  
369 recall (correct positive predictions out of all actual positives). Kappa values were highest (~0.75) for  
370 LightGBM and XGBoost for the 32- and 48-variable feature sets, suggesting good agreement between  
371 model predictions and actual classifications, beyond what would be expected by chance.

372

## 373 **Feature importance**

374 For the 8- and 20- variable sets, leukopenia was the top-performing feature for SVM, ANN, RF,  
375 LightGBM, XGBoost, and LR, followed by thrombocytopenia and rash (S1 Fig, S2 Fig, S6 Table). Age  
376 group, days post onset, eye pain, and absence of nasal discharge also emerged as important predictors for  
377 RF, LightGBM, and XGBoost. In contrast, AdaBoost identified blue lips, hepatomegaly, and hypotension  
378 as the highest scoring features. AdaBoost focuses on creating a series of weak learners (typically decision  
379 stumps) and combines them to form a strong classifier. It gives more weight to misclassified instances in  
380 subsequent iterations, which can result in a different feature importance profile as the model emphasizes  
381 different aspects of the data to improve accuracy. For the 32- and 48- variable sets, monthly dengue  
382 incidence showed the highest predictive power for SVM, RF, ANN, LightGBM, XGBoost, and LR (S3  
383 Fig, S4 Fig).

384 In the subanalysis where the most important features identified by the highest performing ML  
385 model, XGBoost, were sequentially added to the feature set, we observed variable improvements in AUC  
386 values (S5 Fig). The initial addition of two variables increased the AUC by 2.8%, suggesting a substantial  
387 enhancement in model performance with the inclusion of high-priority predictors. As more variables were  
388 added, the gains in AUC became marginal, with incremental improvements ranging from 0% to 1.5%. By  
389 quantifying the gains in AUC through sequential addition of important features, this analysis highlights  
390 that a relatively small set of highly predictive features can achieve substantial diagnostic performance,  
391 reinforcing the utility of ML-based feature selection in optimizing clinical models.

392

## 393 Discussion

394 The use of various ML algorithms, including RF, AdaBoost, LightGBM, and XGBoost,  
395 demonstrate significant improvements in diagnostic accuracy for dengue infection compared to traditional  
396 methods. Prior research has shown that the diagnostic accuracy of the 1997 and 2009 WHO clinical case  
397 definitions for dengue has high sensitivity (93%) but low specificity (29% and 31%, respectively),  
398 making it challenging to distinguish dengue from other febrile illnesses in clinical settings [45]. With  
399 AUC values exceeding 90% for larger feature sets, these models could potentially reduce misdiagnosis  
400 rates and improve patient outcomes, especially in settings where rapid tests are either not authorized or  
401 limited in availability. Furthermore, ML models can be instrumental during large dengue outbreaks,  
402 where rapid triage is essential. For instance, an ANN model developed for dengue severity prognosis  
403 demonstrated good performance using demographic information and laboratory test results, indicating  
404 that ML can quickly predict disease severity and assist in efficient patient triage [20]. Supporting this,  
405 other studies have shown high accuracy and effectiveness of ML in dengue diagnosis: an Extra Trees  
406 Classifier model achieved over 99% accuracy in Yemen [48], XGBoost reached an AUC of 86% in  
407 patients with AFI in Vietnam [49], and Decision Tree and Multilayer Perceptron models attained 98%  
408 accuracy in Brazil [50]. Other research on predicting severe COVID-19 in hospitalized children

409 demonstrated higher diagnostic performance with ML approaches compared to LR, with just a few simple  
410 and easily collected parameters [22].

411           The identification of key features such as leukopenia, rash, thrombocytopenia, and age group  
412 aligns with clinical knowledge of dengue presentations, validating the models' ability to capture relevant  
413 clinical indicators and suggesting they can effectively complement and enhance existing diagnostic  
414 processes. Leukopenia and thrombocytopenia are well-documented hematological manifestations of  
415 dengue, indicating the disease's impact on the blood cell count [51] and were identified as key predictive  
416 variables in a similar study [20]. Although these hematological markers substantially contributed to  
417 model performance, particularly in smaller feature sets, the XGBoost model with the 48-variable set  
418 excluding leukopenia and thrombocytopenia achieved an AUC of 94.1%, demonstrating that strong  
419 predictive performance can be attained without relying solely on these laboratory values. This finding  
420 highlights the potential for accurate dengue prediction in resource-limited settings where access to CBCs  
421 may be restricted. Although IgG testing modestly improved AUCs, its limited availability, potential for  
422 misinterpretation in routine clinical practice, and reliance on specialized laboratory infrastructure  
423 compared to readily available CBCs restrict its utility as a routine diagnostic tool. The inclusion of age  
424 group is consistent with other ML prediction models [20, 22] and highlights the varying clinical  
425 presentations and risks across different age demographics, underscoring the need for age-specific  
426 diagnostic approaches. Rash, while common in dengue, is also seen in various other febrile illnesses and  
427 should be considered alongside other symptoms for differential diagnosis [53]. Similarly, the absence of  
428 nasal discharge, more indicative of respiratory pathogens, can also aid in differentiation. Other similar  
429 studies also identified body temperature [20] and duration of fever [21] as important features.

430           Identifying monthly dengue incidence as a key feature underscores the value of temporal patterns  
431 for accurate dengue prediction. However, the impact of this data may vary depending on its granularity.  
432 While our study highlights potential benefits, other research suggests that using broader regional  
433 incidence data may yield smaller improvements compared to more localized data reflecting the specific  
434 transmission dynamics in a patient's area [21]. These findings suggest the need for real-time surveillance

435 and timely intervention strategies, potentially leading to more effective public health responses during  
436 peak transmission periods [54]. By leveraging localized monthly incidence data, healthcare systems can  
437 better allocate resources, anticipate outbreaks, and implement targeted prevention measures, ultimately  
438 reducing the burden of dengue on communities.

439 Despite the high performance of advanced models like XGBoost, it is noteworthy that simpler  
440 models like multivariable LR also achieved AUCs of 91% for the larger feature sets. This indicates that a  
441 substantial portion of the predictive power lies within core features, potentially making LR a more  
442 interpretable and computationally efficient option for some applications. However, for the larger feature  
443 sets, gradient boosting models (XGBoost, LightGBM, AdaBoost) outperformed LR, SVM, and ANN,  
444 which may be attributed to the gradient boosting models' ability to better capture complex feature  
445 interactions and non-linear relationships within the data. Gradient boosting models are inherently  
446 designed to improve prediction accuracy by iteratively focusing on the hardest-to-predict cases, which can  
447 be particularly advantageous when dealing with larger and more complex feature sets. On the other hand,  
448 consistently lower AUC values for SVM and ANN across all feature sets in our study suggest potential  
449 challenges these models face in capturing intricate feature interactions and effectively generalizing from  
450 the data. Specifically, ANNs may struggle with high-dimensional datasets due to the “curse of  
451 dimensionality,” where the addition of more features can lead to sparse data, making patterns harder to  
452 identify [55]. This, coupled with the risk of overfitting—where the model memorizes the training data but  
453 fails to generalize well to unseen data—can reduce accuracy, increase training times, and decrease  
454 interpretability. These factors contribute to the observed performance gap between ANNs and the gradient  
455 boosting models, particularly as the feature set size grows.

456 The observation that the performance improvement between the 32-variable and 48-variable sets  
457 is minimal suggests a point of diminishing returns. Here, additional features contribute little to predictive  
458 power while potentially increasing model complexity and training time. Thus, while ensemble methods  
459 like XGBoost may be preferable for applications where maximizing predictive accuracy is paramount, it  
460 is important to weigh the benefits of added complexity against the potential gains in performance.

461           While some models demonstrated high sensitivity, others prioritized specificity, highlighting the  
462 need to carefully consider the desired balance between correctly identifying true positives (high  
463 sensitivity) and minimizing false positives (high specificity) for specific clinical applications. Another  
464 study from Thailand suggests that incorporating dengue NS1 rapid test results enhances diagnostic  
465 specificity in models like Bayesian networks, indicating potential for similar improvements in our ML  
466 models, which could better confirm non-dengue cases when combined with clinical and laboratory data  
467 [21].

468           This study was subject to several limitations. First, the dataset's heavy skew towards data from  
469 the 2012-2013 outbreak and its primary focus on DENV-1 may limit the generalizability of the models to  
470 other periods, regions, or serotypes. Future research should focus on validating these models in diverse  
471 settings, integrating real-time data, and exploring the inclusion of newer diagnostic features to refine their  
472 accuracy and applicability further. Second, although more features generally improve model performance,  
473 there is a risk of overfitting, especially with smaller datasets. Third, the models were developed using data  
474 from SEDSS, where the inclusion criteria required febrile illness. This criterion may limit the  
475 generalizability of the models to populations without similar inclusion criteria. Fourth, as diagnostic tools,  
476 these models would need to be re-fitted to different variables and populations to ensure their accuracy and  
477 applicability across various settings. Fifth, the SEDSS dataset used in this study is systematically  
478 collected and robust, which may not accurately reflect the conditions of real-world datasets. In many real-  
479 world applications, data from electronic health records can be sparse, contain free text fields, or have  
480 incomplete information. This could affect the model's performance if it were trained on less-structured  
481 data.

482           This study demonstrates the potential of ML models, particularly XGBoost and LightGBM, to  
483 improve dengue diagnostic accuracy. By incorporating a wider range of features, including temporal  
484 patterns like monthly dengue incidence, these models achieved high AUC values, exceeding 90% for  
485 larger feature sets. This enables early and precise diagnosis, which could lead to improved patient  
486 outcomes and reduced viral spread during outbreaks, particularly in resource-scarce settings where the



487 availability of rapid tests is often constrained. Furthermore, our findings highlight the importance of both  
488 complex ensemble methods and simpler models. While XGBoost and LightGBM offer superior  
489 performance, even LR achieved strong accuracy with core features. However, careful consideration of  
490 model interpretability, generalizability, and continuous validation are crucial for real-world  
491 implementation. It is important to note that these ML models are intended to aid and improve dengue  
492 diagnosis rather than replace current methods, such as laboratory testing. Future research should focus on  
493 addressing these aspects to ensure robust and generalizable ML models that can empower clinicians and  
494 public health authorities to effectively manage and control dengue worldwide.

495         To facilitate clinical application, developing a user-friendly tool such as a calculator, Shiny app,  
496 or web-based interface to implement the prediction model is a crucial next step. This would bridge the  
497 gap between complex ML models and clinical practice, allowing for efficient integration into routine care  
498 and potentially improving diagnostic accuracy and timeliness.

499

## 500 **Acknowledgments**

501 **Disclaimer:** The findings and conclusions in this report are those of the authors and do not necessarily  
502 represent the official position of the US Centers for Disease Control and Prevention.

## 503 References

- 504 1. Paz-Bailey G, Adams LE, Deen J, Anderson KB, Katzelnick LC. Dengue. *Lancet*.  
505 2024;403(10427):667-82.
- 506 2. Gubler DJ. The global emergence/resurgence of arboviral diseases as public health problems.  
507 *Archives of medical research*. 2002;33(4):330-42.
- 508 3. Madewell ZJ. Arboviruses and Their Vectors. *South Med J*. 2020;113(10):520-3.
- 509 4. Simmons CP, Farrar JJ, Nguyen v V, Wills B. Dengue. *N Engl J Med*. 2012;366(15):1423-32.
- 510 5. Toan NT, Rossi S, Prisco G, Nante N, Viviani S. Dengue epidemiology in selected endemic  
511 countries: factors influencing expansion factors as estimates of underreporting. *Trop Med Int*  
512 *Health*. 2015;20(7):840-63.
- 513 6. Undurraga EA, Halasa YA, Shepard DS. Use of expansion factors to estimate the burden of  
514 dengue in Southeast Asia: a systematic analysis. *PLoS Negl Trop Dis*. 2013;7(2):e2056.
- 515 7. Bhatt S, Gething PW, Brady OJ, Messina JP, Farlow AW, Moyes CL, et al. The global  
516 distribution and burden of dengue. *Nature*. 2013;496(7446):504-7.
- 517 8. Global, regional, and national age-sex-specific mortality for 282 causes of death in 195 countries  
518 and territories, 1980-2017: a systematic analysis for the Global Burden of Disease Study 2017.  
519 *Lancet*. 2018;392(10159):1736-88.
- 520 9. Sharp TM, Ryff KR, Santiago GA, Margolis HS, Waterman SH. Lessons Learned from Dengue  
521 Surveillance and Research, Puerto Rico, 1899-2013. *Emerg Infect Dis*. 2019;25(8):1522-30.
- 522 10. Centers for Disease Control and Prevention. ArboNET 2024 [cited 2024 August 19]. Available  
523 from: <https://www.cdc.gov/mosquitoes/php/arboNET/index.html>.
- 524 11. Ryff KR, Rivera A, Rodriguez DM, Santiago GA, Medina FA, Ellis EM, et al. Epidemiologic  
525 Trends of Dengue in U.S. Territories, 2010-2020. *MMWR Surveill Summ*. 2023;72(4):1-12.
- 526 12. Méndez-Lázaro P, Muller-Karger F, Otis D, Mccarthy M, Peña-Orellana M. Assessing Climate  
527 Variability Effects on Dengue Incidence in San Juan, Puerto Rico. *International Journal of*  
528 *Environmental Research and Public Health*. 2014;11(9):9409-28.
- 529 13. Wong JM, Volkman HR, Adams LE, García CO, Martínez-Quiñones A, Pérez-Padilla J, et al.  
530 Clinical Features of COVID-19, Dengue, and Influenza among Adults Presenting to Emergency  
531 Departments and Urgent Care Clinics—Puerto Rico, 2012–2021. *The American Journal of*  
532 *Tropical Medicine and Hygiene*. 2023;108(1):107.
- 533 14. Wong J, Horwitz MM, Zhou L, Toh S. Using machine learning to identify health outcomes from  
534 electronic health record data. *Curr Epidemiol Rep*. 2018;5(4):331-42.
- 535 15. Rocha FP, Giesbrecht M. Machine learning algorithms for dengue risk assessment: a case study  
536 for São Luís do Maranhão. *Computational and Applied Mathematics*. 2022;41(8):393.
- 537 16. Nasir M, Summerfield NS, Carreiro S, Berlowitz D, Oztekin A. A machine learning approach for  
538 diagnostic and prognostic predictions, key risk factors and interactions. *Health Services and*  
539 *Outcomes Research Methodology*. 2024.
- 540 17. Lai CK, Leung E, He Y, Cheung CC, Oliver MOY, Yu Q, et al. A machine learning-based risk  
541 score for prediction of infective endocarditis among patients with *Staphylococcus aureus*  
542 bacteraemia - The SABIERS score. *J Infect Dis*. 2024.
- 543 18. Tiwari P, Colborn KL, Smith DE, Xing F, Ghosh D, Rosenberg MA. Assessment of a Machine  
544 Learning Model Applied to Harmonized Electronic Health Record Data for the Prediction of  
545 Incident Atrial Fibrillation. *JAMA Netw Open*. 2020;3(1):e1919396.
- 546 19. Ho TS, Weng TC, Wang JD, Han HC, Cheng HC, Yang CC, et al. Comparing machine learning  
547 with case-control models to identify confirmed dengue cases. *PLoS Negl Trop Dis*.  
548 2020;14(11):e0008843.

- 549 20. Huang SW, Tsai HP, Hung SJ, Ko WC, Wang JR. Assessing the risk of dengue severity using  
550 demographic information and laboratory test results with machine learning. *PLoS Negl Trop Dis.*  
551 2020;14(12):e0008960.
- 552 21. Sa-Ngamuang C, Haddawy P, Luvira V, Piyaphanee W, Iamsirithaworn S, Lawpoolsri S.  
553 Accuracy of dengue clinical diagnosis with and without NS1 antigen rapid test: Comparison  
554 between human and Bayesian network model decision. *PLoS Negl Trop Dis.*  
555 2018;12(6):e0006573.
- 556 22. Liu P, Xing Z, Peng X, Zhang M, Shu C, Wang C, et al. Machine learning versus multivariate  
557 logistic regression for predicting severe COVID-19 in hospitalized children with Omicron variant  
558 infection. *J Med Virol.* 2024;96(2):e29447.
- 559 23. Tomashek KM, Rivera A, Torres-Velasquez B, Hunsperger EA, Munoz-Jordan JL, Sharp TM, et  
560 al. Enhanced Surveillance for Fatal Dengue-Like Acute Febrile Illness in Puerto Rico, 2010-  
561 2012. *PLoS Negl Trop Dis.* 2016;10(10):e0005025.
- 562 24. Madewell ZJ, Hernandez-Romieu AC, Wong JM, Zambrano LD, Volkman HR, Perez-Padilla J,  
563 et al. Sentinel Enhanced Dengue Surveillance System - Puerto Rico, 2012-2022. *MMWR Surveill*  
564 *Summ.* 2024;73(3):1-29.
- 565 25. Read JS, Torres-Velasquez B, Lorenzi O, Rivera Sanchez A, Torres-Torres S, Rivera LV, et al.  
566 Symptomatic Zika Virus Infection in Infants, Children, and Adolescents Living in Puerto Rico.  
567 *JAMA Pediatr.* 2018;172(7):686-93.
- 568 26. Harris PA, Taylor R, Minor BL, Elliott V, Fernandez M, O'Neal L, et al. The REDCap  
569 consortium: Building an international community of software platform partners. *J Biomed*  
570 *Inform.* 2019;95:103208.
- 571 27. Harris PA, Taylor R, Thielke R, Payne J, Gonzalez N, Conde JG. Research electronic data  
572 capture (REDCap)--a metadata-driven methodology and workflow process for providing  
573 translational research informatics support. *J Biomed Inform.* 2009;42(2):377-81.
- 574 28. Siriseriwan W. smotefamily: A Collection of Oversampling Techniques for Class Imbalance  
575 Problem Based on SMOTE 2024 [cited 2024 June 17]. Available from: [https://cran.r-](https://cran.r-project.org/web/packages/smotefamily/index.html)  
576 [project.org/web/packages/smotefamily/index.html](https://cran.r-project.org/web/packages/smotefamily/index.html).
- 577 29. Kuhn M. caret: Classification and Regression Training 2023 [cited 2024 June 17]. Available  
578 from: <https://cran.r-project.org/web/packages/caret/index.html>.
- 579 30. Breiman L. Random forests. *Machine learning.* 2001;45:5-32.
- 580 31. Hearst MA, Dumais ST, Osuna E, Platt J, Scholkopf B. Support vector machines. *IEEE*  
581 *Intelligent Systems and their applications.* 1998;13(4):18-28.
- 582 32. Yegnanarayana B. Artificial neural networks: PHI Learning Pvt. Ltd.; 2009.
- 583 33. Schapire RE. The boosting approach to machine learning: An overview. *Nonlinear estimation and*  
584 *classification.* 2003:149-71.
- 585 34. Bentéjac C, Csörgő A, Martínez-Muñoz G. A comparative analysis of gradient boosting  
586 algorithms. *Artificial Intelligence Review.* 2021;54:1937-67.
- 587 35. Breiman L. randomForest: Breiman and Cutler's Random Forests for Classification and  
588 Regression 2022 [cited 2024 June 17]. Available from: [https://cran.r-](https://cran.r-project.org/web/packages/randomForest/index.html)  
589 [project.org/web/packages/randomForest/index.html](https://cran.r-project.org/web/packages/randomForest/index.html).
- 590 36. Meyer D. e1071: Misc Functions of the Department of Statistics, Probability Theory Group  
591 (Formerly: E1071), TU Wien 2023 [cited 2024 June 20]. Available from: [https://cran.r-](https://cran.r-project.org/web/packages/e1071/index.html)  
592 [project.org/web/packages/e1071/index.html](https://cran.r-project.org/web/packages/e1071/index.html).
- 593 37. Ripley B. nnet: Feed-Forward Neural Networks and Multinomial Log-Linear Models 2023 [cited  
594 2024 June 18]. Available from: <https://cran.r-project.org/web/packages/nnet/index.html>.
- 595 38. Culp M. ada: The R Package Ada for Stochastic Boosting 2016 [cited 2024 June 18]. Available  
596 from: <https://cran.r-project.org/web/packages/ada/index.html>.
- 597 39. Shi Y. lightgbm: Light Gradient Boosting Machine 2024 [cited 2024 June 17]. Available from:  
598 <https://cran.r-project.org/web/packages/lightgbm/index.html>.

- 599 40. Chen T. xgboost: Extreme Gradient Boosting 2024 [cited 2024 June 17]. Available from:  
600 <https://cran.r-project.org/web/packages/xgboost/index.html>.
- 601 41. DeLong ER, DeLong DM, Clarke-Pearson DL. Comparing the areas under two or more  
602 correlated receiver operating characteristic curves: a nonparametric approach. *Biometrics*.  
603 1988;44(3):837-45.
- 604 42. Youden WJ. Index for rating diagnostic tests. *Cancer*. 1950;3(1):32-5.
- 605 43. Altmann A, Toloşi L, Sander O, Lengauer T. Permutation importance: a corrected feature  
606 importance measure. *Bioinformatics*. 2010;26(10):1340-7.
- 607 44. R Core Team. R: A language and environment for statistical computing. Vienna, Austria: R  
608 Foundation for Statistical Computing; 2024 [
- 609 45. Raafat N, Loganathan S, Mukaka M, Blacksell SD, Maude RJ. Diagnostic accuracy of the WHO  
610 clinical definitions for dengue and implications for surveillance: A systematic review and meta-  
611 analysis. *PLoS Negl Trop Dis*. 2021;15(4):e0009359.
- 612 46. Sigera PC, Amarasekara R, Rodrigo C, Rajapakse S, Weeratunga P, De Silva NL, et al. Risk  
613 prediction for severe disease and better diagnostic accuracy in early dengue infection; the  
614 Colombo dengue study. *BMC Infect Dis*. 2019;19(1):680.
- 615 47. Mejía MFÁ, Shu P-Y, Ji D-D. Accuracy of Dengue, Chikungunya, and Zika diagnoses by  
616 primary healthcare physicians in Tegucigalpa, Honduras. *BMC Infectious Diseases*.  
617 2023;23(1):371.
- 618 48. Abdualgalil B, Abraham S, M. Ismael W. Early Diagnosis for Dengue Disease Prediction Using  
619 Efficient Machine Learning Techniques Based on Clinical Data. 2022. 2022;3(3):12.
- 620 49. Ming DK, Tuan NM, Hernandez B, Sangkaew S, Vuong NL, Chanh HQ, et al. The Diagnosis of  
621 Dengue in Patients Presenting With Acute Febrile Illness Using Supervised Machine Learning  
622 and Impact of Seasonality. *Front Digit Health*. 2022;4:849641.
- 623 50. Bohm BC, Borges FEM, Silva SCM, Soares AT, Ferreira DD, Belo VS, et al. Utilization of  
624 machine learning for dengue case screening. *BMC Public Health*. 2024;24(1):1573.
- 625 51. Vogt MB, Lahon A, Arya RP, Spencer Clinton JL, Rico-Hesse R. Dengue viruses infect human  
626 megakaryocytes, with probable clinical consequences. *PLoS Negl Trop Dis*.  
627 2019;13(11):e0007837.
- 628 52. Teo A, Tan HD, Loy T, Chia PY, Chua CLL. Understanding antibody-dependent enhancement in  
629 dengue: Are afucosylated IgG1s a concern? *PLoS Pathog*. 2023;19(3):e1011223.
- 630 53. Daumas RP, Passos SRL, Oliveira RVC, Nogueira RMR, Georg I, Marzochi KBF, Brasil P.  
631 Clinical and laboratory features that discriminate dengue from other febrile illnesses: a diagnostic  
632 accuracy study in Rio de Janeiro, Brazil. *BMC Infectious Diseases*. 2013;13(1):77.
- 633 54. Madewell ZJ, Hemme RR, Adams L, Barrera R, Waterman SH, Johansson MA. Comparing  
634 vector and human surveillance strategies to detect arbovirus transmission: A simulation study for  
635 Zika virus detection in Puerto Rico. *PLoS Negl Trop Dis*. 2019;13(12):e0007988.
- 636 55. Grohs P, Ibragimov S, Jentzen A, Koppensteiner S. Lower bounds for artificial neural network  
637 approximations: A proof that shallow neural networks fail to overcome the curse of  
638 dimensionality. *Journal of Complexity*. 2023;77:101746.

639

41 640

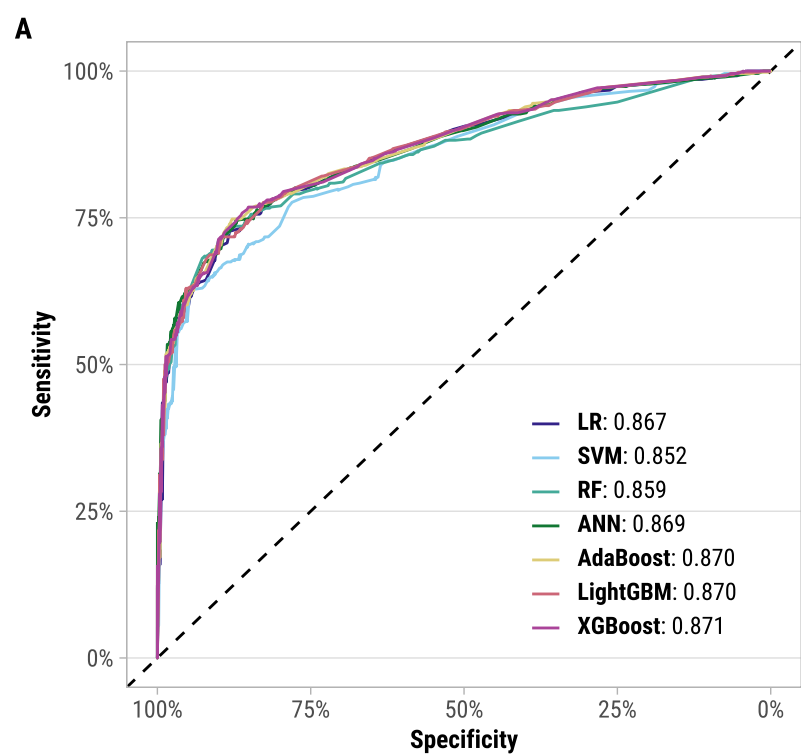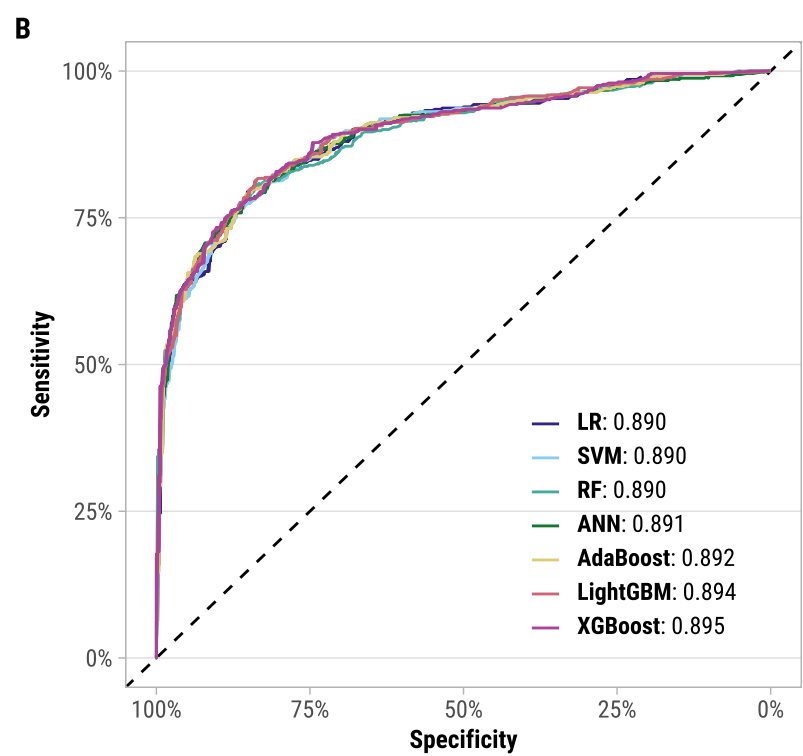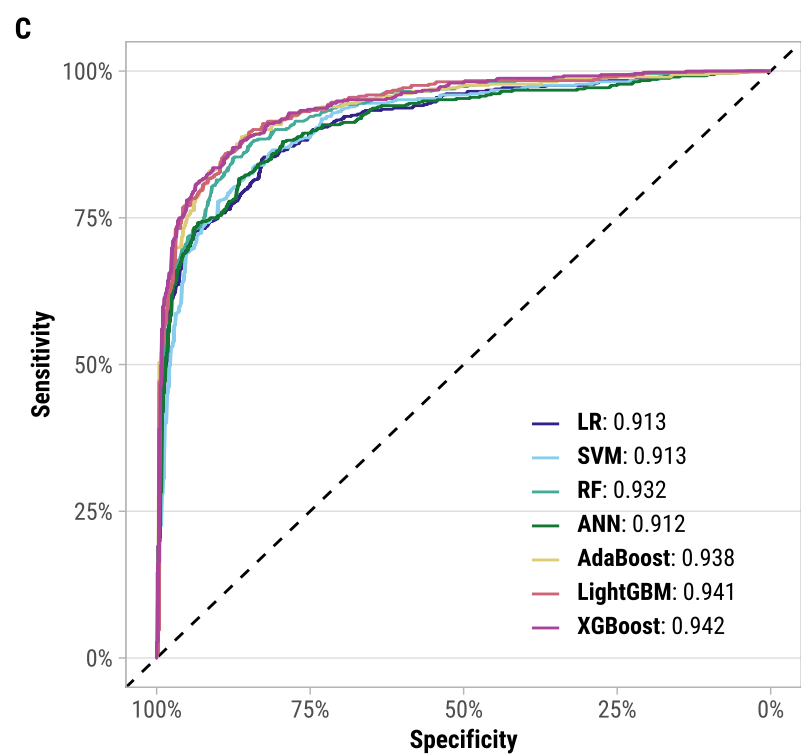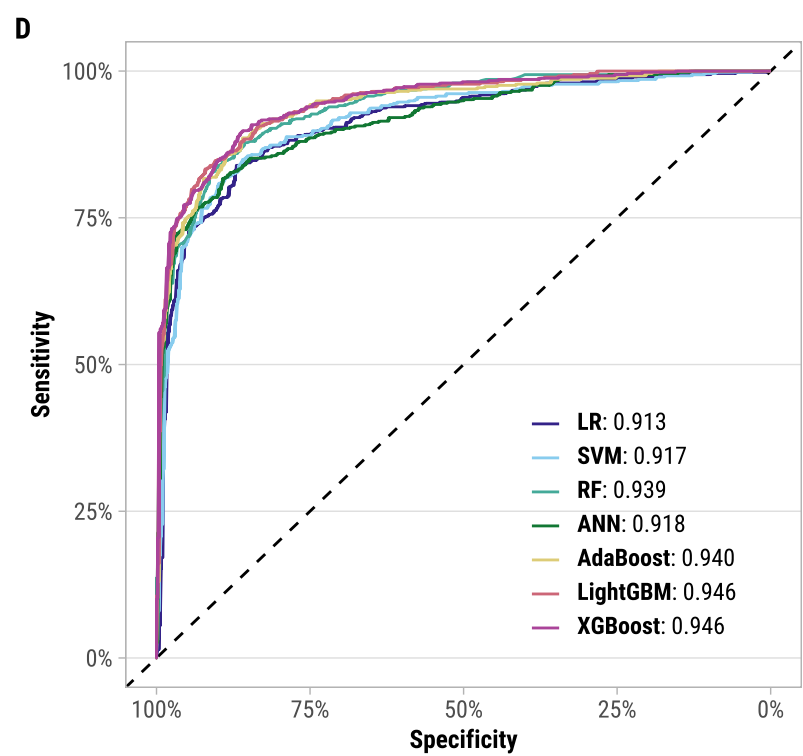

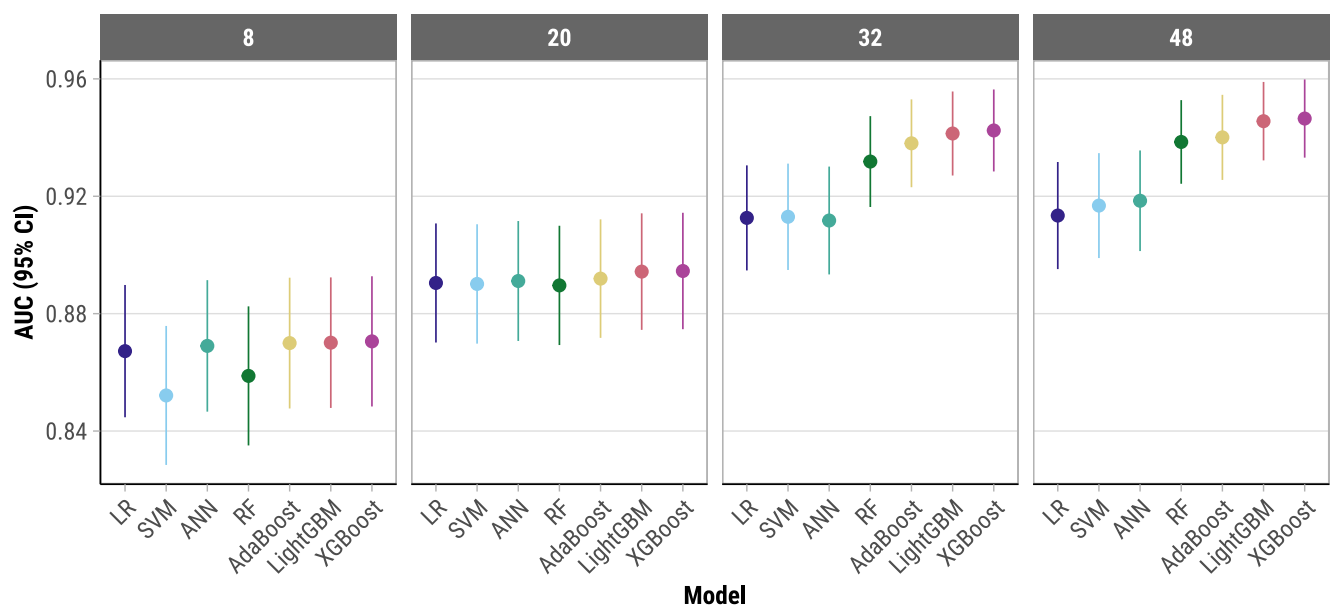

Source: https://medrxiv.org/content/10.1101/2024.11.13.24317272.full.pdf
